# Supplementary material for: Variations in the Distribution of Chl-a and Simulation Using a Multiple Regression Model
Source: MDPI journal article supplement (doi:10.3390/ijerph16224553), 2019-11-18
Supplement: s1 [file s1]

**Table S1. Supporting Information.**

Collinearity statistics of the five water quality variables derived from a multiple linear regression using a stepwise method.

| Model | D | Eigenvalue | CI     | Variance Proportions |     |      |     |     |     |
|-------|---|------------|--------|----------------------|-----|------|-----|-----|-----|
|       |   |            |        | Constant             | DOM | DO   | TP  | WT  | pH  |
| 1     | 1 | 1.948      | 1.000  | .03                  | .03 |      |     |     |     |
|       | 2 | .052       | 6.108  | .97                  | .97 |      |     |     |     |
| 2     | 1 | 2.932      | 1.000  | .00                  | .01 | .00  |     |     |     |
|       | 2 | .067       | 6.613  | .01                  | .95 | .01  |     |     |     |
|       | 3 | .001       | 48.579 | .99                  | .04 | .99  |     |     |     |
| 3     | 1 | 3.739      | 1.000  | .00                  | .00 | .00  | .01 |     |     |
|       | 2 | .228       | 4.048  | .00                  | .00 | .00  | .34 |     |     |
|       | 3 | .031       | 10.914 | .01                  | .86 | .00  | .55 |     |     |
|       | 4 | .001       | 57.891 | .99                  | .14 | 1.00 | .10 |     |     |
| 4     | 1 | 4.585      | 1.000  | .00                  | .00 | .00  | .00 | .01 |     |
|       | 2 | .241       | 4.366  | .00                  | .00 | .00  | .32 | .07 |     |
|       | 3 | .142       | 5.685  | .00                  | .01 | .00  | .01 | .79 |     |
|       | 4 | .031       | 12.101 | .01                  | .84 | .00  | .52 | .00 |     |
|       | 5 | .001       | 69.079 | .99                  | .14 | 1.00 | .15 | .14 |     |
| 5     | 1 | 5.446      | 1.000  | .00                  | .00 | .00  | .00 | .00 | .00 |
|       | 2 | .321       | 4.117  | .00                  | .00 | .00  | .17 | .01 | .02 |
|       | 3 | .187       | 5.395  | .00                  | .01 | .00  | .08 | .30 | .01 |
|       | 4 | .032       | 13.098 | .00                  | .87 | .00  | .55 | .00 | .01 |
|       | 5 | .013       | 20.307 | .05                  | .01 | .01  | .16 | .39 | .78 |
|       | 6 | .001       | 82.817 | .95                  | .10 | .99  | .04 | .30 | .18 |

D denotes dimension; CI means the condition index
